# Supplementary material for: Gut Microbial Signatures Can Discriminate Unipolar from Bipolar Depression
Source: PubMed Central journal article supplement (PMC7140990; doi:10.1002/advs.201902862), 2020-02-05
Supplement: ADVS-7-1902862-s001.pdf [file ADVS-7-1902862-s001.pdf]

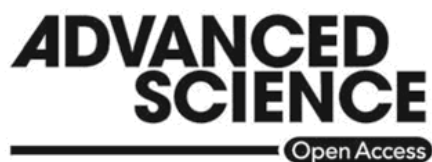

## Supporting Information

for *Adv. Sci.*, DOI: 10.1002/advs.201902862

### Gut Microbial Signatures Can Discriminate Unipolar from Bipolar Depression

*Peng Zheng, Jian Yang, Yifan Li, Jing Wu, Weiwei Liang,  
Bangmin Yin, Xunmin Tan, Yu Huang, Tingjia Chai, Hanping  
Zhang, Jiajia Duan, Jingjing Zhou, Zuoli Sun, Xu Chen,  
Subhi Marwari, Jianbo Lai, Tingting Huang, Yanli Du, Peifen  
Zhang, Seth W. Perry, Ma-Li Wong, Julio Licinio, Shaohua  
Hu,\* Peng Xie,\* and Gang Wang\**

## Supplementary Materials

### Supplementary Figures

**Figure. S1.** The workflow diagram for this work.

**Figure. S2.** The influence of potential confounders on overall microbial composition.

**Figure. S3.** The influence of potential confounder on overall microbial composition.

**Figure. S4.** Discriminative OTUs observed in the pairwise comparisons between the three groups.

**Figure. S5.** Co-occurrence networks deduced from the relative abundance of differential OTUs between MDD and BD.

**Figure. S6.** Validation of diagnostic performance of microbial markers in discovery set.

**[Figures below]**

**Figure. S1**

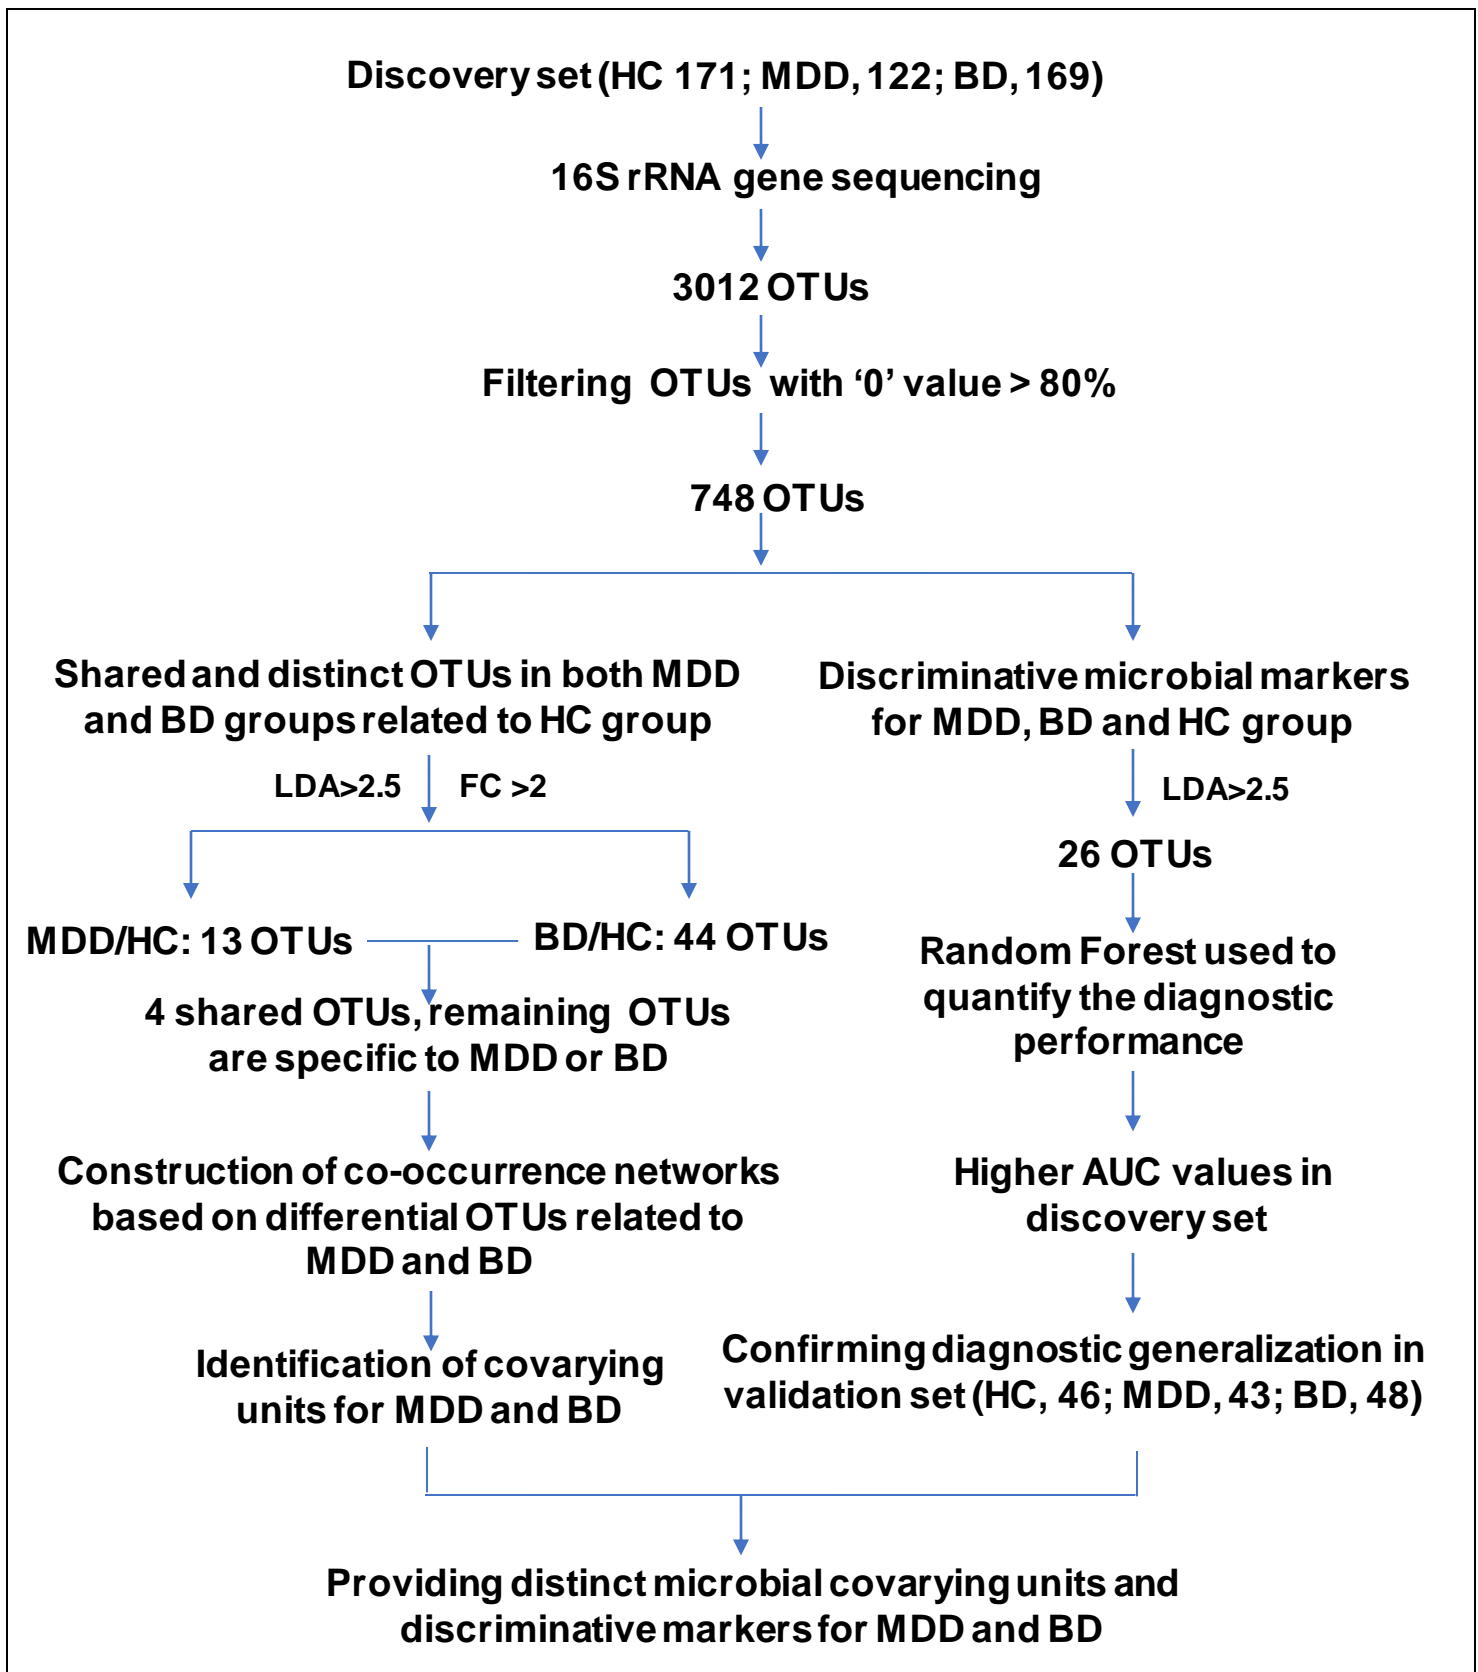

**Figure. S1. The workflow diagram for this work.** Abbreviation: HC, healthy controls; MDD, major depressive disorder; BD, bipolar disorder; OTU, operational taxonomic units; AUC, area under the curve; LEfSe, linear discriminant analysis effect size; FC, fold changes.

**Figure. S2.**

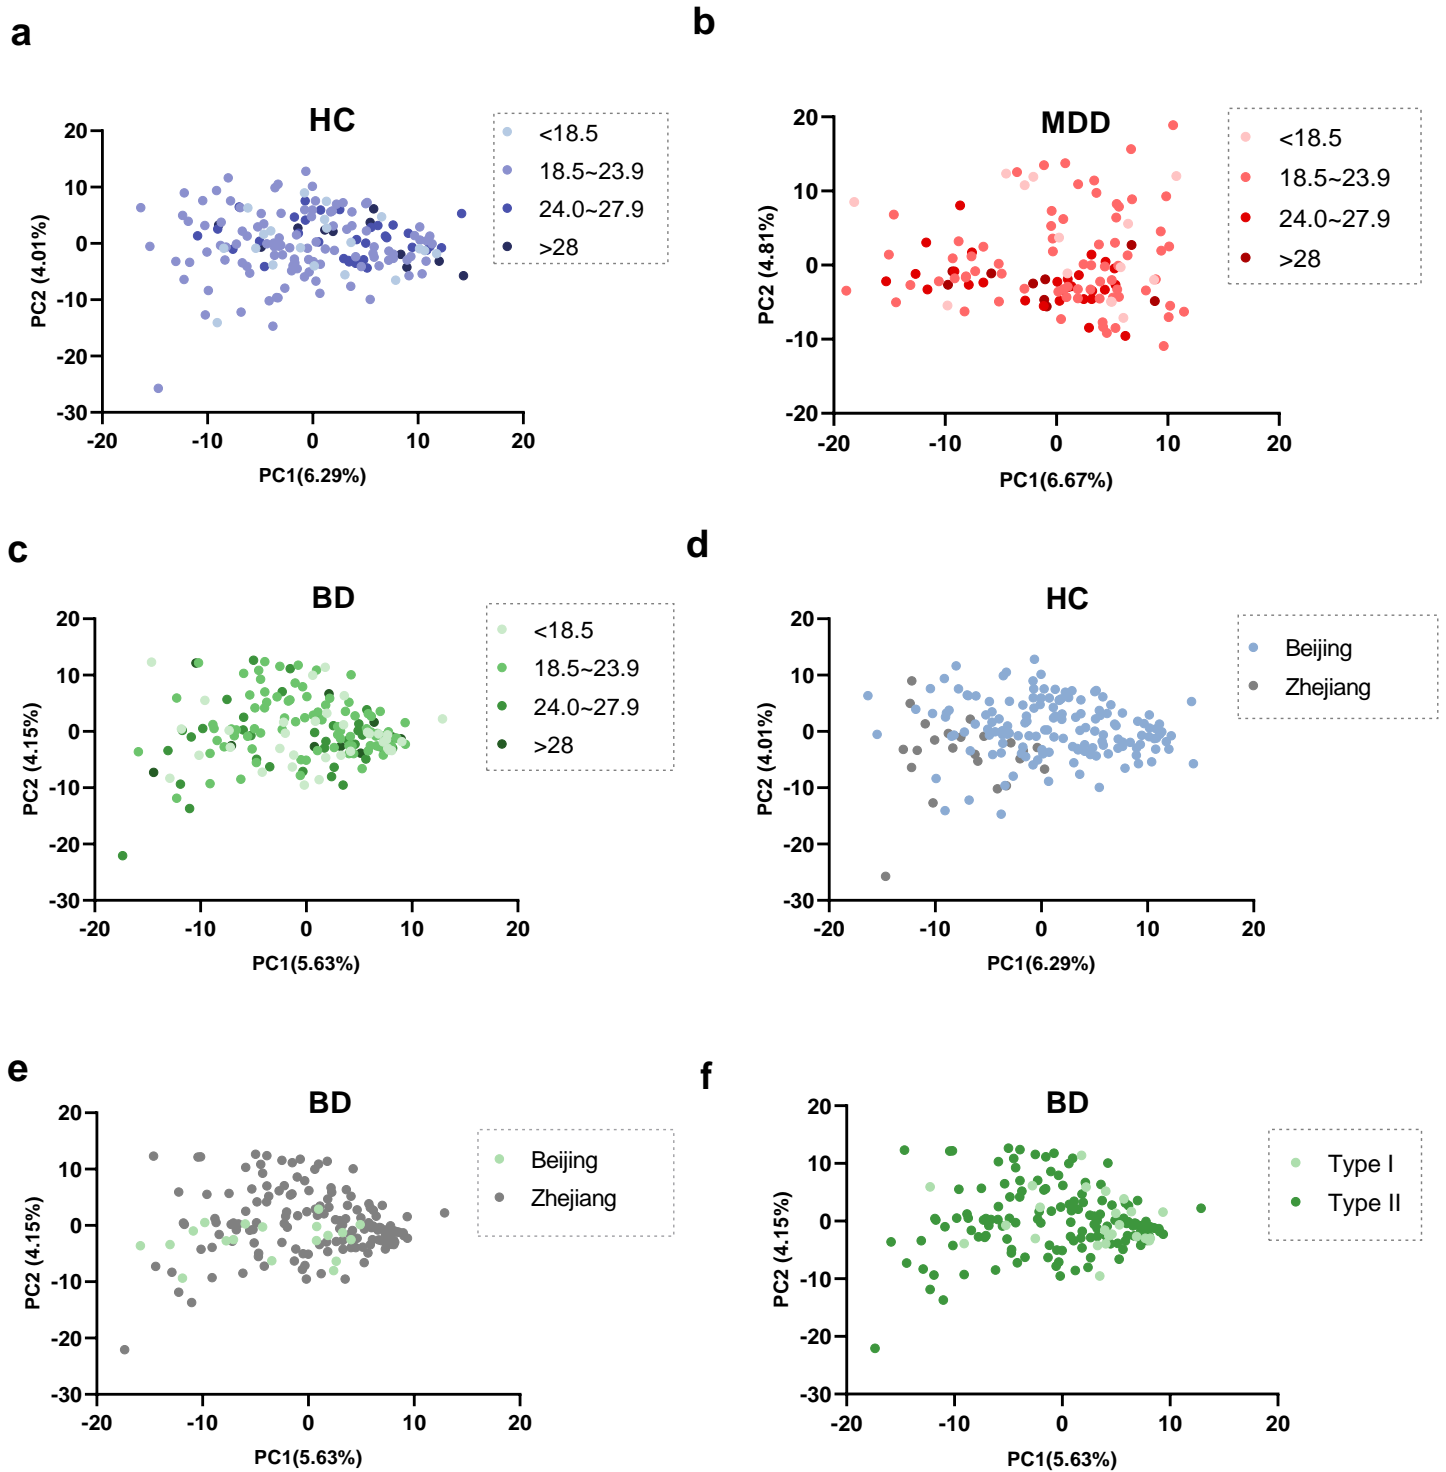

**Figure. S2. The influence of potential confounders on overall microbial composition.** (a-c) The samples from MDD, BD and HC groups were not clustered based on Body Mass Index. (d-e) The samples from BD and HC groups were not clustered based on research centers (Beijing or Zhejiang). (f) The samples of BD-I were almost mixed with samples of BD-II. Here, all samples were obtained from discovery set.

**Figure. S3.**

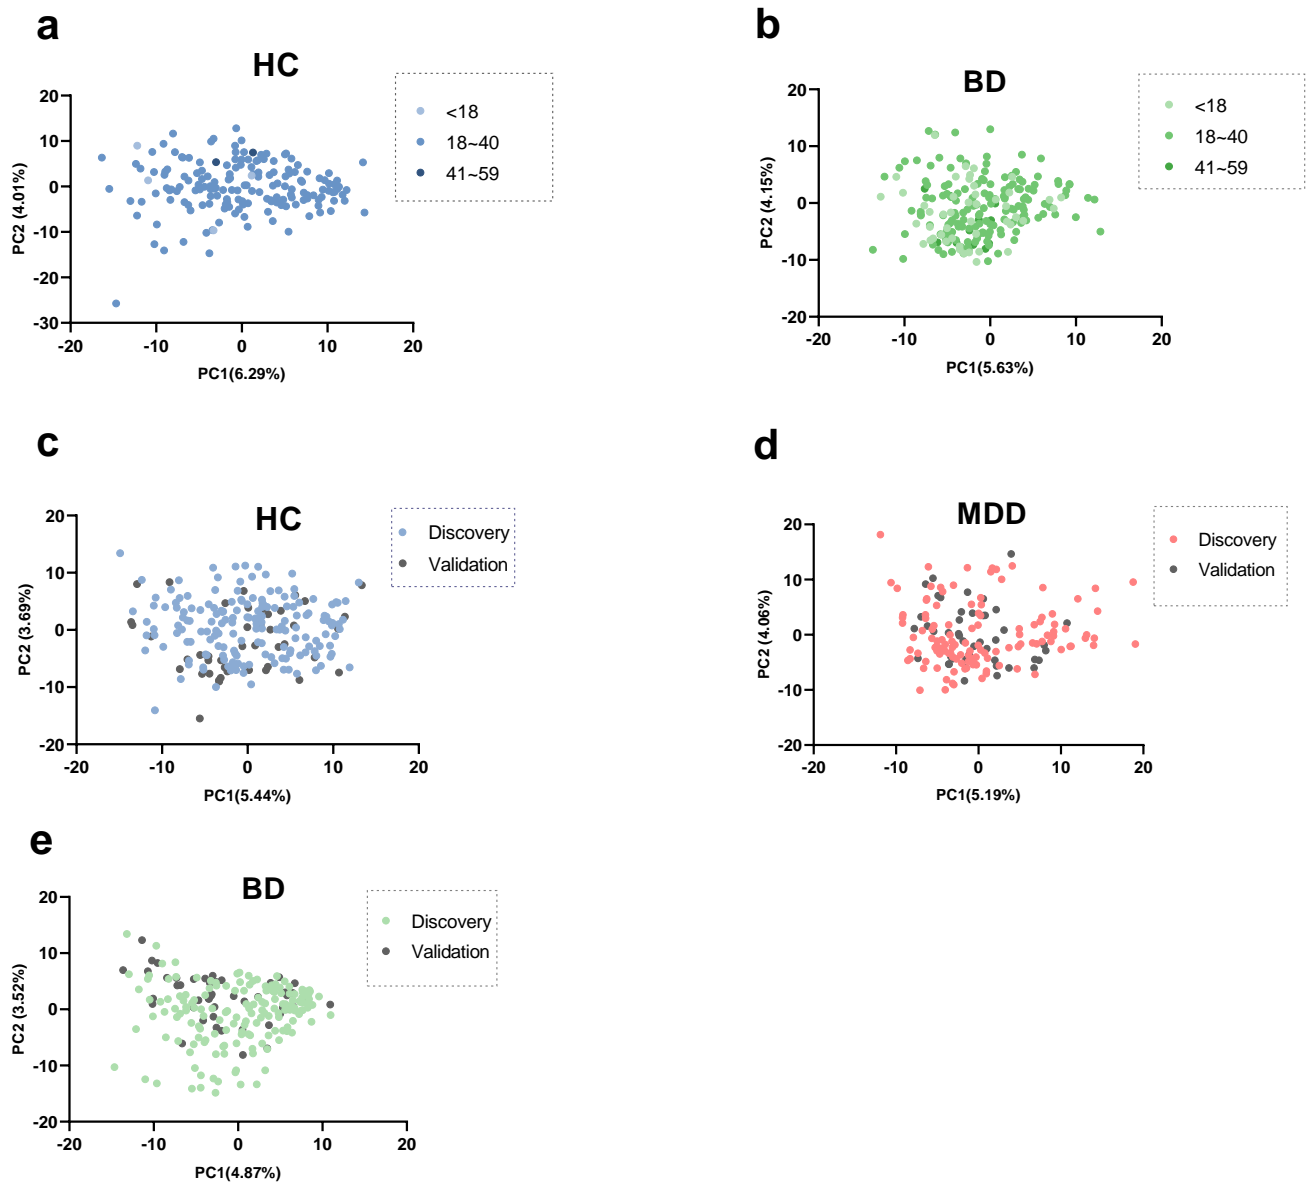

**Figure. S3. The influence of potential confounders on overall microbial composition.**

(a-b) The samples from different age periods were mixed with the remaining samples in the respective group. (c-e) The samples in the validation set (grey dots) are mixed with the corresponding samples in the discovery set.

Figure. S4.

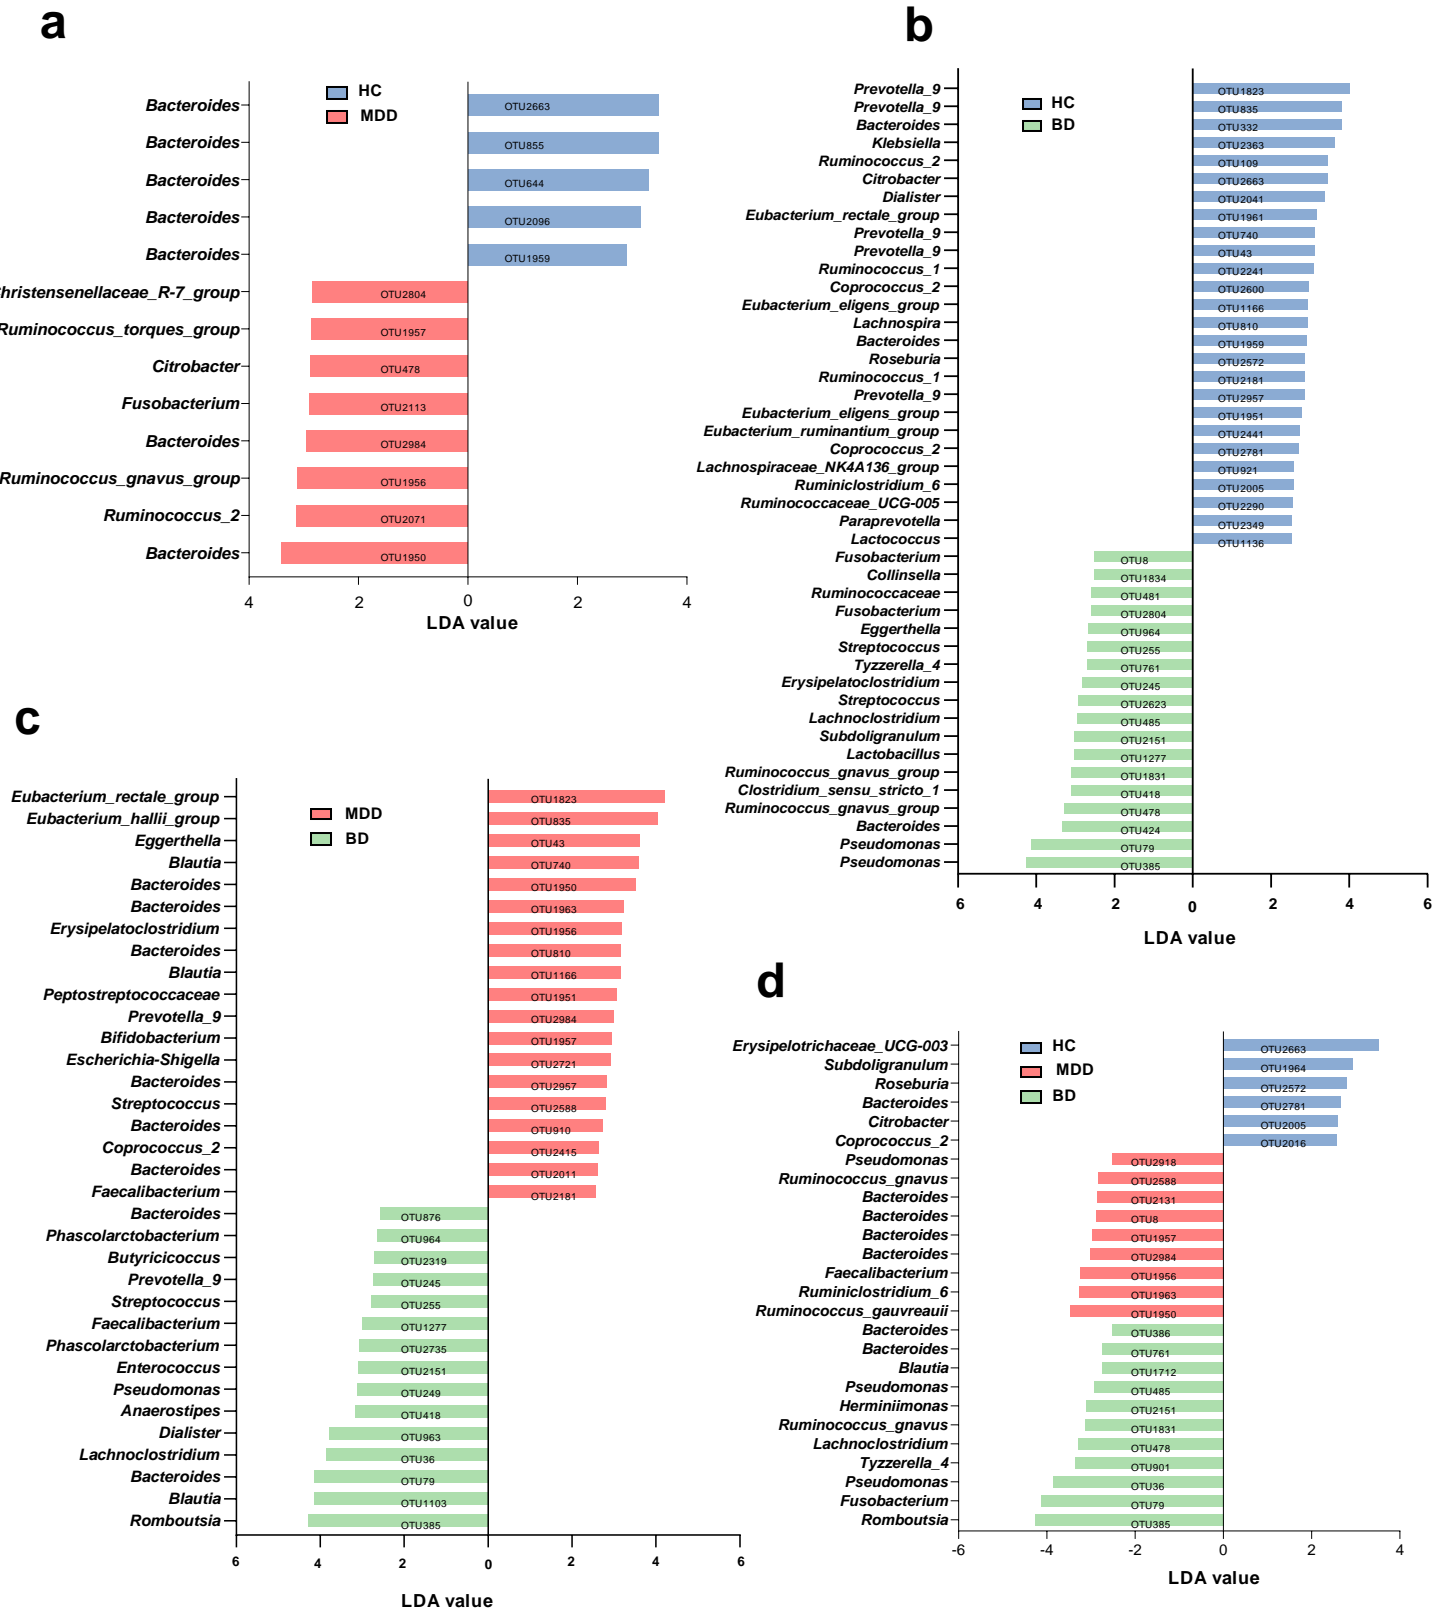

Figure. S4. Discriminative OTUs observed in the pairwise comparisons between the three groups. Using LEfSe analysis, the OTUs responsible for the discrimination among three groups were identified (LDA >2.5, fold change >2).

**Figure. S5**

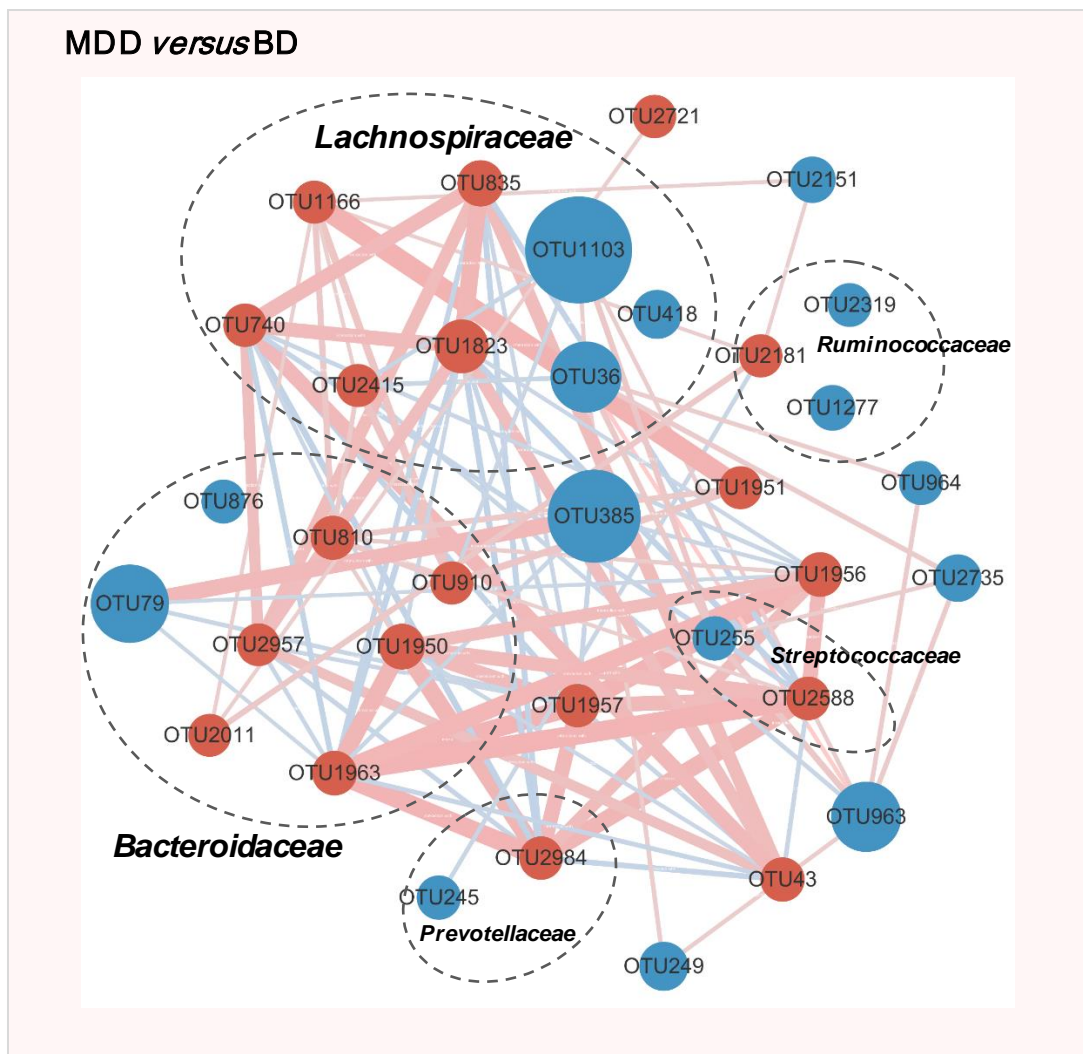

**Figure. S5. Co-occurrence networks deduced from the relative abundance of differential OTUs between MDD and BD.** The differential OTUs between MDD and BD groups were identified by LDA (LDA>2.5 and fold change>2). Totally, 34 OTUs were responsible for this discrimination. Compared with BD group, the MDD group was mainly characterized by altered covarying OTUs belonging to Bacteroidaceae and Lachnospiraceae. Red dots, increased relative abundance in MDD; blue dots, increased relative abundance in BD. OTUs annotated to family level were marked. Edges between nodes indicate Spearman's correlation  $< -0.35$  (light blue), or  $> 0.35$  (light red), edges thickness indicate p value ( $p < 0.05$ ).

Figure. S6

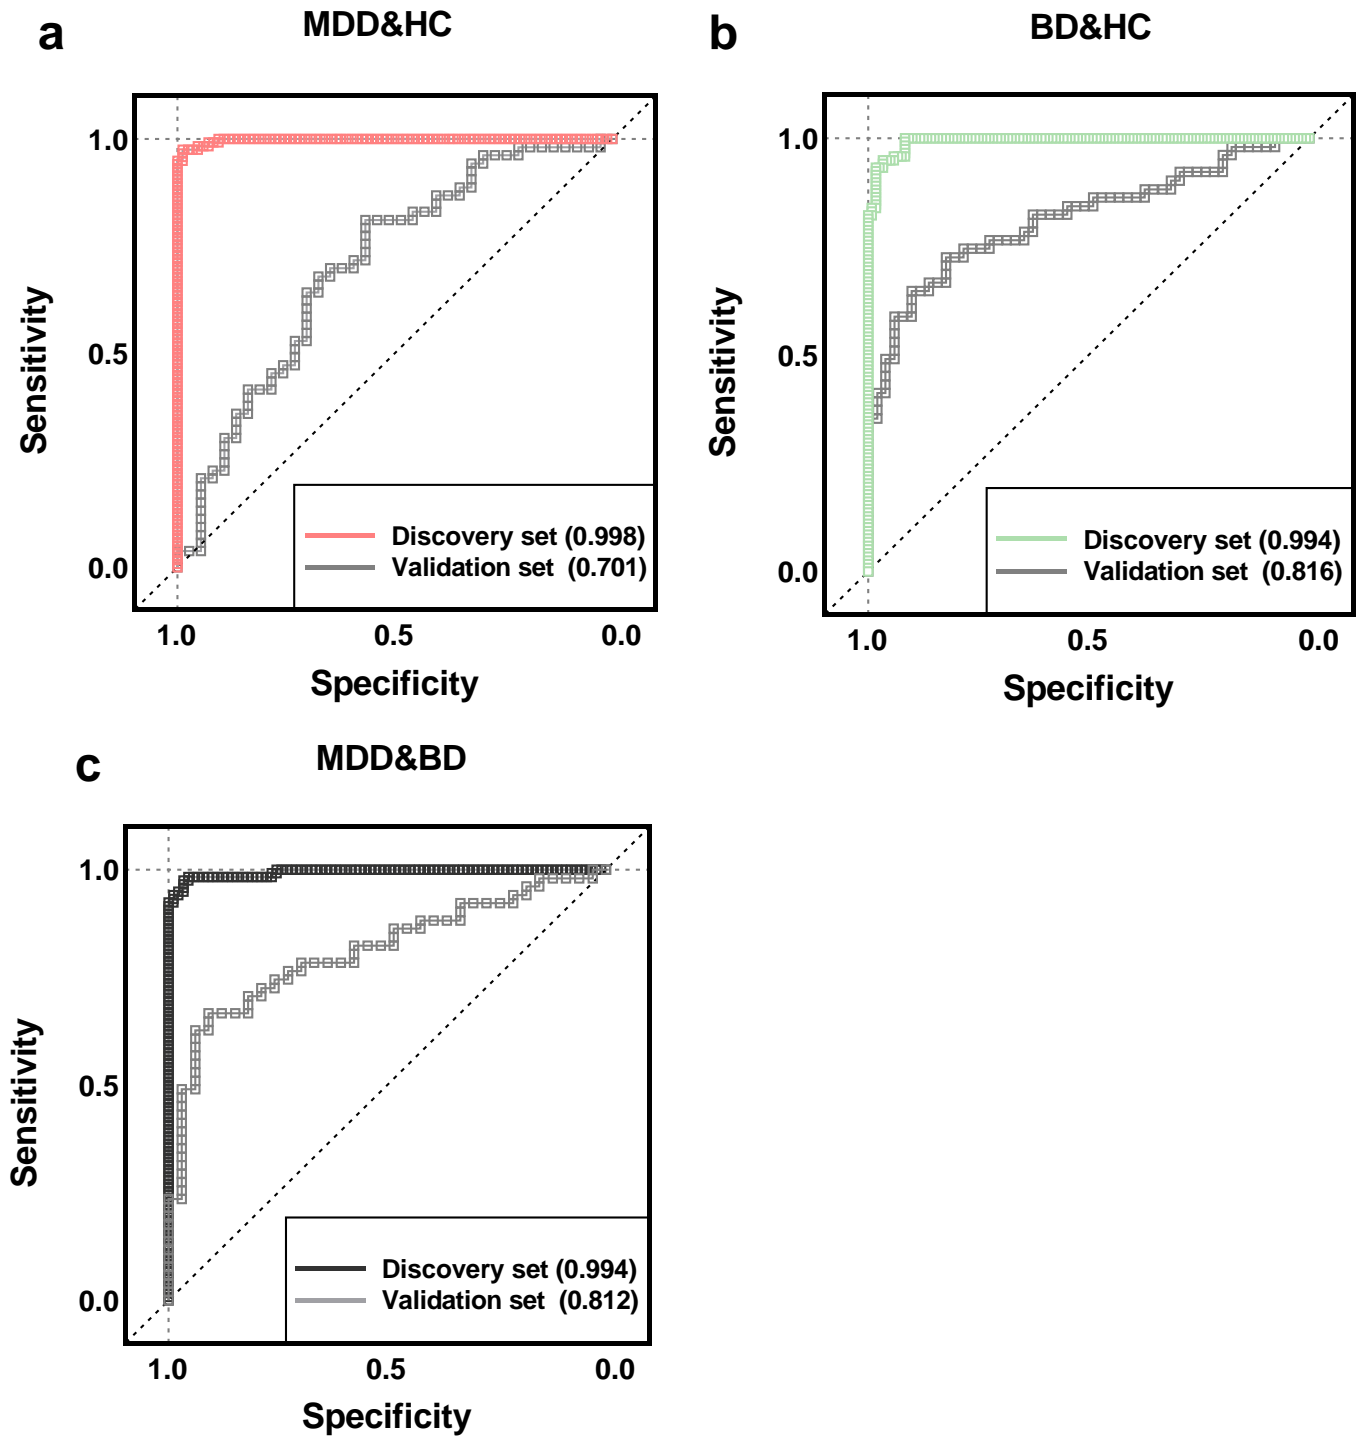

**Figure. S6. Validation of diagnostic performance of microbial markers in discovery set.** (a-c) Random Forest analysis was used to quantify the diagnostic performance in discovery set. The samples from discovery set were randomly divided into two groups. The group 1 was composed of 80% of samples from discovery set; the remaining samples were assigned to group 2. In group 1, this microbial panel enabled distinguishing the patients with MDD from those with BD or HCs, yielding a high diagnostic accuracy (MDD versus HC, AUC=0.998; BD versus HC, AUC=0.994; MDD versus BD, AUC=0.994). The diagnostic efficiency of this microbial classifier was further tested in group 2. Consequently, the diagnostic performance was confirmed with AUC values of at least 0.7 (MDD versus HC, AUC=0.701; BD versus HC, AUC=0.816; MDD versus BD, AUC=0.812; Group 1: HC, n=122; MDD, n=84; BD, n=118; Group 2: HC, n=49; MDD, n=38; BD, n=51.)



## Supplementary Tables

**Table S1.** Detailed clinical characteristics of the subjects.

**Table S2.** Discriminatory microbes of family level among MDD, BD and HC groups.

**Table S3.** Discriminatory operational taxonomic units (OTUs) between MDD and HC groups.

**Table S4.** Discriminatory operational taxonomic units (OTUs) between BD and HC groups.

**Table S5.** Discriminatory operational taxonomic units (OTUs) between MDD and BD groups.

**Table S6.** Discriminatory operational taxonomic units (OTUs) among HC, MDD and BD groups.

**[Tables below]**

**Table S1. Detailed clinical characteristics of the subjects.**

| Variables                      | Discovery set |            |            |        | Validation set |            |             |        |
|--------------------------------|---------------|------------|------------|--------|----------------|------------|-------------|--------|
|                                | HC            | MDD        | BD         | P      | HC             | MDD        | BD          | P      |
| <b>Samples</b>                 | 171           | 122        | 169        | -      | 46             | 43         | 48          | -      |
| <b>Gender (male%)</b>          | 41.52%        | 36.89%     | 50.30%     | 0.06   | 52.17%         | 32.56%     | 64.58%      | 0.015  |
| <b>Age</b>                     | 26.85±5.48    | 26.54±4.07 | 25.59±8.41 | 0.177  | 45.4±7.1       | 37.13±9.15 | 21.87±7.44  | <0.001 |
| <b>BMI</b>                     | 22.07±3.38    | 22.41±3.63 | 21.77±3.68 | 0.316  | 24.07±2.5      | 22.08±3.1  | 25.06±3.51  | <0.001 |
| <b>Area (Beijing/Zhejiang)</b> | 148/23        | 122/0      | 19/150     | -      | 24/22          | 43/0       | 28/20       | -      |
| <b>HAMD</b>                    | -             | 22.65±5.50 | 26.13±9.79 | 0.0005 | -              | 23.47±4.64 | 28.49±10.34 | 0.001  |
| <b>YMRS</b>                    | -             | -          | 3.24±4.43  | -      | -              | -          | 6.00±6.03   | -      |
| <b>Medication</b>              | -             | -          | -          | -      | -              | 18/43      | 25/48       | -      |

One-way ANOVA was used to compare the continuous variables including age, body mass index and clinical scales; Categorical variable (gender) was analyzed by Chi-square test.

Abbreviations: HC, Healthy controls; MDD, major depressive disorder; BD, bipolar disorder; BMI, Body Mass Index; HAMD, Hamilton Depression Scale; YMRS, Young Mania Rating Scale.

**Table S2. Discriminatory microbes of family level among MDD, BD and HC groups.**

| Family level                  | HC      |         | MDD     |         | BD      |         | p-value (Kruskal-Wallis test) |        |        |          |
|-------------------------------|---------|---------|---------|---------|---------|---------|-------------------------------|--------|--------|----------|
|                               | mean    | sd      | mean    | sd      | mean    | sd      | BD/HC                         | MDD/BD | MDD/HC | 3 groups |
| Bacteroidaceae                | 1.4E-01 | 1.8E-01 | 1.6E-01 | 1.7E-01 | 1.0E-01 | 1.3E-01 | 0.199                         | 0.002  | 0.048  | 0.07     |
| Enterobacteriaceae            | 6.7E-02 | 1.5E-01 | 4.3E-02 | 1.1E-01 | 6.8E-02 | 1.2E-01 | 0.021                         | 0.012  | 0.832  | 0.25     |
| Bifidobacteriaceae            | 5.2E-02 | 8.3E-02 | 6.7E-02 | 8.4E-02 | 6.0E-02 | 8.4E-02 | 0.174                         | 0.004  | 0.095  | 0.14     |
| Veillonellaceae               | 3.4E-02 | 8.4E-02 | 4.5E-02 | 1.0E-01 | 3.0E-02 | 9.4E-02 | 0.068                         | 0.005  | 0.251  | 0.16     |
| Pseudomonadaceae              | 4.4E-04 | 8.3E-04 | 6.7E-04 | 4.2E-03 | 7.1E-02 | 1.8E-01 | 0.04                          | <0.001 | <0.001 | <0.001   |
| Streptococcaceae              | 1.5E-02 | 3.9E-02 | 9.2E-03 | 1.5E-02 | 1.9E-02 | 3.6E-02 | 0.835                         | 0.001  | 0.005  | 0.002    |
| Peptostreptococcaceae         | 1.4E-02 | 2.8E-02 | 1.2E-02 | 2.9E-02 | 1.7E-02 | 2.3E-02 | 0.029                         | <0.001 | 0.003  | <0.001   |
| Acidaminococcaceae            | 1.0E-02 | 2.1E-02 | 1.6E-02 | 2.8E-02 | 1.2E-02 | 3.0E-02 | 0.518                         | 0.003  | 0.023  | 0.003    |
| Alcaligenaceae                | 5.1E-03 | 1.0E-02 | 5.3E-03 | 7.4E-03 | 3.4E-03 | 9.6E-03 | 0.002                         | <0.001 | 0.059  | <0.001   |
| Clostridiaceae_1              | 2.4E-03 | 5.3E-03 | 2.7E-03 | 6.6E-03 | 6.2E-03 | 1.5E-02 | 0.422                         | 0.001  | 0.005  | 0.001    |
| Lactobacillaceae              | 2.5E-03 | 1.1E-02 | 1.2E-03 | 3.9E-03 | 5.5E-03 | 2.4E-02 | 0.849                         | 0.001  | 0.001  | <0.001   |
| Fusobacteriaceae              | 6.4E-04 | 3.9E-03 | 3.4E-03 | 1.4E-02 | 2.5E-03 | 8.3E-03 | 0.733                         | <0.001 | <0.001 | <0.001   |
| Bacteroidales_S24-7_group     | 1.6E-03 | 8.0E-03 | 1.0E-03 | 4.8E-03 | 2.5E-03 | 1.2E-02 | 0.313                         | <0.001 | <0.001 | <0.001   |
| Enterococcaceae               | 2.4E-03 | 2.4E-02 | 4.7E-04 | 2.3E-03 | 1.5E-03 | 9.8E-03 | 0.162                         | <0.001 | 0.017  | 0.001    |
| norank_o__Mollicutes_RF9      | 1.1E-03 | 3.2E-03 | 1.1E-03 | 3.9E-03 | 1.1E-03 | 6.0E-03 | 0.264                         | 0.003  | 0.101  | 0.01     |
| Family_XIII                   | 7.5E-04 | 9.1E-04 | 7.9E-04 | 1.5E-03 | 1.3E-03 | 1.9E-03 | 0.148                         | <0.001 | 0.016  | 0.001    |
| Micrococcaceae                | 9.7E-05 | 4.0E-04 | 6.0E-05 | 1.7E-04 | 1.6E-03 | 1.5E-02 | 0.105                         | <0.001 | 0.002  | <0.001   |
| unclassified_o__Clostridiales | 7.2E-04 | 9.4E-04 | 6.0E-04 | 8.1E-04 | 4.0E-04 | 1.1E-03 | <0.001                        | <0.001 | 0.093  | <0.001   |

|                                     |         |         |         |         |         |         |        |        |        |        |
|-------------------------------------|---------|---------|---------|---------|---------|---------|--------|--------|--------|--------|
| norank_p__Saccharibacteria          | 4.0E-04 | 1.0E-03 | 2.4E-04 | 4.1E-04 | 6.4E-04 | 1.6E-03 | 0.159  | <0.001 | <0.001 | <0.001 |
| Leuconostocaceae                    | 4.9E-04 | 2.0E-03 | 6.0E-04 | 2.2E-03 | 2.5E-04 | 8.4E-04 | 0.702  | 0.017  | 0.028  | 0.027  |
| Actinomycetaceae                    | 2.8E-04 | 4.9E-04 | 2.9E-04 | 5.1E-04 | 6.2E-04 | 1.0E-03 | 0.574  | <0.001 | <0.001 | <0.001 |
| Comamonadaceae                      | 2.0E-05 | 6.9E-05 | 9.5E-06 | 4.0E-05 | 7.3E-04 | 7.1E-03 | 0.076  | <0.001 | <0.001 | <0.001 |
| unclassified_p__Firmicutes          | 2.9E-04 | 4.4E-04 | 3.0E-04 | 3.0E-04 | 2.2E-04 | 3.1E-04 | 0.002  | <0.001 | 0.128  | <0.001 |
| Oxalobacteraceae                    | 3.9E-05 | 1.0E-04 | 3.5E-05 | 9.6E-05 | 5.9E-04 | 1.5E-03 | 0.102  | <0.001 | <0.001 | <0.001 |
| Carnobacteriaceae                   | 1.5E-04 | 2.9E-04 | 1.0E-04 | 2.0E-04 | 3.8E-04 | 9.6E-04 | 0.309  | <0.001 | 0.001  | <0.001 |
| unclassified_k__norank              | 2.2E-04 | 3.7E-04 | 2.5E-04 | 2.6E-04 | 1.8E-04 | 3.3E-04 | <0.001 | <0.001 | 0.153  | <0.001 |
| Family_XI_o__Clostridiales          | 8.9E-05 | 2.0E-04 | 1.1E-04 | 3.6E-04 | 3.4E-04 | 1.1E-03 | 0.797  | 0.014  | 0.016  | 0.018  |
| unclassified_o__Bacteroidales       | 2.0E-04 | 4.4E-04 | 2.3E-04 | 6.2E-04 | 1.0E-04 | 3.1E-04 | 0.001  | <0.001 | 0.469  | <0.001 |
| norank_c__Cyanobacteria             | 1.3E-04 | 4.5E-04 | 2.0E-05 | 5.6E-05 | 2.1E-04 | 1.0E-03 | 0.007  | <0.001 | 0.252  | 0.001  |
| Eubacteriaceae                      | 1.5E-05 | 5.1E-05 | 1.8E-04 | 1.6E-03 | 1.3E-04 | 3.4E-04 | 0.002  | <0.001 | 0.002  | <0.001 |
| unclassified_c__Gammaproteobacteria | 1.2E-04 | 2.2E-04 | 8.4E-05 | 1.6E-04 | 8.1E-05 | 1.8E-04 | 0.075  | <0.001 | 0.008  | <0.001 |
| Family_XI_o__Bacillales             | 7.2E-05 | 1.7E-04 | 5.5E-05 | 1.2E-04 | 1.2E-04 | 2.7E-04 | 0.491  | 0.003  | 0.014  | 0.006  |
| Aerococcaceae                       | 1.2E-05 | 4.3E-05 | 1.4E-05 | 5.6E-05 | 1.9E-04 | 1.4E-03 | 0.725  | <0.001 | <0.001 | <0.001 |
| Synergistaceae                      | 3.7E-05 | 2.0E-04 | 2.6E-05 | 7.8E-05 | 1.3E-04 | 4.0E-04 | 0.984  | 0.01   | 0.019  | 0.015  |
| Burkholderiaceae                    | 2.8E-05 | 8.6E-05 | 1.7E-05 | 5.0E-05 | 6.9E-05 | 1.9E-04 | 0.674  | <0.001 | <0.001 | <0.001 |
| Corynebacteriaceae                  | 1.4E-05 | 2.8E-05 | 1.2E-05 | 2.7E-05 | 8.4E-05 | 3.0E-04 | 0.579  | <0.001 | <0.001 | <0.001 |
| Staphylococcaceae                   | 8.4E-06 | 5.0E-05 | 8.6E-06 | 2.6E-05 | 7.9E-05 | 7.9E-04 | 0.652  | <0.001 | 0.001  | <0.001 |

**Table S3. Discriminatory operational taxonomic units (OTUs) between MDD and HC groups.**

| OTU ID  | Taxonomic Assignment |                     |                         | Relative Abundance |         |           |         | LDA value | LDA p-value | Enrichment |
|---------|----------------------|---------------------|-------------------------|--------------------|---------|-----------|---------|-----------|-------------|------------|
|         | Phyla                | Family              | Genus                   | HC(mean)           | HC(SD)  | MDD(mean) | MDD(SD) |           |             |            |
| OTU1950 | Bacteroidetes        | Bacteroidaceae      | Bacteroides             | 3.9E-03            | 1.1E-02 | 8.5E-03   | 1.8E-02 | 3.41      | 0.003       | MDD        |
| OTU1956 | Bacteroidetes        | Bacteroidaceae      | Bacteroides             | 2.4E-03            | 7.1E-03 | 5.1E-03   | 1.0E-02 | 3.11      | 0.003       | MDD        |
| OTU1957 | Bacteroidetes        | Bacteroidaceae      | Bacteroides             | 1.0E-03            | 3.0E-03 | 2.6E-03   | 5.4E-03 | 2.86      | <0.001      | MDD        |
| OTU1959 | Bacteroidetes        | Bacteroidaceae      | Bacteroides             | 2.1E-03            | 8.1E-03 | 5.9E-04   | 2.2E-03 | 2.89      | 0.032       | HC         |
| OTU2071 | Bacteroidetes        | Bacteroidaceae      | Bacteroides             | 2.5E-03            | 5.6E-03 | 5.3E-03   | 1.1E-02 | 3.13      | 0.002       | MDD        |
| OTU2096 | Firmicutes           | Christensenellaceae | Christensenellaceae_R-7 | 4.3E-03            | 1.5E-02 | 1.4E-03   | 4.4E-03 | 3.16      | 0.039       | HC         |
| OTU2113 | Firmicutes           | Lachnospiraceae     | Ruminococcus_torques    | 8.8E-04            | 1.2E-03 | 2.3E-03   | 5.0E-03 | 2.89      | 0.002       | MDD        |
| OTU2663 | Proteobacteria       | Enterobacteriaceae  | Citrobacter             | 8.2E-03            | 4.6E-02 | 9.9E-04   | 4.0E-03 | 3.48      | <0.001      | HC         |
| OTU2804 | Fusobacteria         | Fusobacteriaceae    | Fusobacterium           | 8.0E-05            | 6.3E-04 | 1.4E-03   | 9.3E-03 | 2.84      | 0.032       | MDD        |
| OTU2984 | Bacteroidetes        | Bacteroidaceae      | Bacteroides             | 1.1E-03            | 2.6E-03 | 2.8E-03   | 5.2E-03 | 2.95      | 0.001       | MDD        |
| OTU478  | Firmicutes           | Lachnospiraceae     | Ruminococcus_gnavus     | 1.4E-03            | 5.0E-03 | 3.0E-03   | 8.5E-03 | 2.88      | 0.008       | MDD        |
| OTU644  | Firmicutes           | Ruminococcaceae     | Ruminococcus_2          | 5.4E-03            | 2.0E-02 | 2.4E-03   | 1.0E-02 | 3.29      | <0.001      | HC         |
| OTU855  | Bacteroidetes        | Bacteroidaceae      | Bacteroides             | 1.1E-02            | 3.4E-02 | 5.6E-03   | 2.0E-02 | 3.48      | 0.04        | HC         |

**Table S4. Discriminatory operational taxonomic units (OTUs) between BD and HC groups.**

| OTU ID  | Taxonomic Assignment |                     |                         | Relative Abundance |         |          |         | LDA value | LDA p-value | Enrichment |
|---------|----------------------|---------------------|-------------------------|--------------------|---------|----------|---------|-----------|-------------|------------|
|         | Phyla                | Family              | Genus                   | HC(mean)           | HC(SD)  | BD(mean) | BD(SD)  |           |             |            |
| OTU109  | Firmicutes           | Ruminococcaceae     | Ruminococcus_2          | 9.7E-03            | 2.0E-02 | 4.2E-03  | 8.7E-03 | 3.45      | 0.001       | HC         |
| OTU1136 | Firmicutes           | Streptococcaceae    | Lactococcus             | 7.4E-04            | 4.7E-03 | 2.5E-04  | 2.6E-03 | 2.52      | 0.001       | HC         |
| OTU1166 | Firmicutes           | Lachnospiraceae     | Eubacterium_eligens     | 2.1E-03            | 5.6E-03 | 4.9E-04  | 1.7E-03 | 2.95      | <0.001      | HC         |
| OTU1277 | Firmicutes           | Lactobacillaceae    | Lactobacillus           | 3.4E-04            | 3.2E-03 | 2.7E-03  | 2.0E-02 | 3.02      | 0.001       | BD         |
| OTU1823 | Bacteroidetes        | Prevotellaceae      | Prevotella_9            | 3.1E-02            | 9.8E-02 | 9.3E-03  | 4.9E-02 | 4.02      | <0.001      | HC         |
| OTU1831 | Firmicutes           | Lachnospiraceae     | Ruminococcus_gnavus     | 1.7E-03            | 5.4E-03 | 4.3E-03  | 1.1E-02 | 3.11      | <0.001      | BD         |
| OTU1834 | Actinobacteria       | Coriobacteriaceae   | Collinsella             | 2.5E-04            | 9.4E-04 | 8.5E-04  | 6.2E-03 | 2.52      | 0.012       | BD         |
| OTU1951 | Firmicutes           | Lachnospiraceae     | Eubacterium_eligens     | 1.6E-03            | 5.7E-03 | 4.5E-04  | 1.5E-03 | 2.79      | <0.001      | HC         |
| OTU1959 | Bacteroidetes        | Bacteroidaceae      | Bacteroides             | 2.1E-03            | 8.1E-03 | 2.7E-04  | 1.2E-03 | 2.91      | 0.002       | HC         |
| OTU1961 | Firmicutes           | Lachnospiraceae     | Eubacterium_rectale     | 4.6E-03            | 1.3E-02 | 1.9E-03  | 3.3E-03 | 3.17      | <0.001      | HC         |
| OTU2005 | Firmicutes           | Ruminococcaceae     | Ruminiclostridium_6     | 7.9E-04            | 3.8E-03 | 1.0E-04  | 6.2E-04 | 2.59      | <0.001      | HC         |
| OTU2041 | Firmicutes           | Veillonellaceae     | Dialister               | 9.3E-03            | 4.3E-02 | 3.9E-03  | 1.2E-02 | 3.36      | 0.019       | HC         |
| OTU2151 | Firmicutes           | Ruminococcaceae     | Subdoligranulum         | 1.3E-03            | 3.3E-03 | 3.2E-03  | 1.3E-02 | 3.02      | <0.001      | BD         |
| OTU2181 | Firmicutes           | Ruminococcaceae     | Ruminococcus_1          | 2.1E-03            | 5.2E-03 | 6.9E-04  | 1.9E-03 | 2.87      | <0.001      | HC         |
| OTU2241 | Firmicutes           | Ruminococcaceae     | Ruminococcus_1          | 3.9E-03            | 1.2E-02 | 1.7E-03  | 5.3E-03 | 3.09      | 0.013       | HC         |
| OTU2290 | Firmicutes           | Ruminococcaceae     | Ruminococcaceae_UCG-005 | 1.1E-03            | 2.9E-03 | 3.6E-04  | 1.4E-03 | 2.56      | 0.005       | HC         |
| OTU2349 | Bacteroidetes        | Prevotellaceae      | Paraprevotella          | 1.0E-03            | 5.0E-03 | 1.9E-04  | 8.7E-04 | 2.52      | 0.002       | HC         |
| OTU2363 | Proteobacteria       | Enterobacteriaceae  | Klebsiella              | 2.0E-02            | 6.9E-02 | 9.4E-03  | 3.7E-02 | 3.63      | <0.001      | HC         |
| OTU2441 | Firmicutes           | Lachnospiraceae     | Eubacterium_ruminantium | 1.6E-03            | 5.6E-03 | 6.0E-04  | 3.2E-03 | 2.73      | 0.002       | HC         |
| OTU245  | Firmicutes           | Erysipelotrichaceae | Erysipelatoclostridium  | 2.3E-04            | 1.1E-03 | 1.5E-03  | 6.0E-03 | 2.82      | <0.001      | BD         |

|         |                |                    |                             |         |         |         |         |      |        |    |
|---------|----------------|--------------------|-----------------------------|---------|---------|---------|---------|------|--------|----|
| OTU255  | Firmicutes     | Streptococcaceae   | Streptococcus               | 8.0E-04 | 1.7E-03 | 1.7E-03 | 3.9E-03 | 2.69 | 0.018  | BD |
| OTU2572 | Firmicutes     | Lachnospiraceae    | Roseburia                   | 1.8E-03 | 6.4E-03 | 4.6E-04 | 1.1E-03 | 2.87 | <0.001 | HC |
| OTU2600 | Firmicutes     | Lachnospiraceae    | Coprococcus_2               | 3.0E-03 | 8.9E-03 | 1.0E-03 | 5.3E-03 | 2.97 | <0.001 | HC |
| OTU2623 | Firmicutes     | Streptococcaceae   | Streptococcus               | 5.6E-04 | 3.5E-03 | 2.2E-03 | 1.9E-02 | 2.92 | <0.001 | BD |
| OTU2663 | Proteobacteria | Enterobacteriaceae | Citrobacter                 | 8.2E-03 | 4.6E-02 | 1.1E-03 | 5.2E-03 | 3.44 | 0.002  | HC |
| OTU2781 | Firmicutes     | Lachnospiraceae    | Coprococcus_2               | 1.5E-03 | 4.1E-03 | 6.3E-04 | 2.6E-03 | 2.72 | <0.001 | HC |
| OTU2804 | Fusobacteria   | Fusobacteriaceae   | Fusobacterium               | 8.0E-05 | 6.3E-04 | 9.2E-04 | 5.0E-03 | 2.59 | 0.01   | BD |
| OTU2957 | Bacteroidetes  | Prevotellaceae     | Prevotella_9                | 1.8E-03 | 9.4E-03 | 3.0E-04 | 2.9E-03 | 2.85 | <0.001 | HC |
| OTU332  | Bacteroidetes  | Bacteroidaceae     | Bacteroides                 | 2.5E-02 | 6.0E-02 | 1.1E-02 | 3.3E-02 | 3.81 | 0.015  | HC |
| OTU385  | Proteobacteria | Pseudomonadaceae   | Pseudomonas                 | 2.2E-04 | 4.3E-04 | 4.1E-02 | 1.1E-01 | 4.25 | <0.001 | BD |
| OTU418  | Firmicutes     | Clostridiaceae_1   | Clostridium_sensu_stricto_1 | 2.2E-03 | 5.2E-03 | 5.4E-03 | 1.4E-02 | 3.12 | 0.027  | BD |
| OTU424  | Bacteroidetes  | Bacteroidaceae     | Bacteroides                 | 1.2E-03 | 3.5E-03 | 6.5E-03 | 2.5E-02 | 3.34 | 0.004  | BD |
| OTU43   | Bacteroidetes  | Prevotellaceae     | Prevotella_9                | 5.2E-03 | 2.2E-02 | 1.6E-03 | 9.6E-03 | 3.12 | 0.004  | HC |
| OTU478  | Firmicutes     | Lachnospiraceae    | Ruminococcus_gnavus         | 1.4E-03 | 5.0E-03 | 5.3E-03 | 1.3E-02 | 3.28 | <0.001 | BD |
| OTU481  | Firmicutes     | Ruminococcaceae    | norank_Ruminococcaceae      | 4.4E-04 | 8.0E-04 | 1.2E-03 | 2.8E-03 | 2.58 | 0.017  | BD |
| OTU485  | Firmicutes     | Lachnospiraceae    | Lachnoclostridium           | 4.4E-04 | 1.4E-03 | 2.2E-03 | 6.2E-03 | 2.95 | <0.001 | BD |
| OTU740  | Bacteroidetes  | Prevotellaceae     | Prevotella_9                | 3.9E-03 | 1.8E-02 | 8.7E-04 | 5.9E-03 | 3.13 | 0.008  | HC |
| OTU761  | Firmicutes     | Lachnospiraceae    | Tyzzarella_4                | 6.4E-04 | 2.3E-03 | 1.6E-03 | 4.5E-03 | 2.7  | 0.022  | BD |
| OTU79   | Proteobacteria | Pseudomonadaceae   | Pseudomonas                 | 2.1E-04 | 4.0E-04 | 2.9E-02 | 6.8E-02 | 4.12 | <0.001 | BD |
| OTU8    | Fusobacteria   | Fusobacteriaceae   | Fusobacterium               | 2.3E-04 | 1.3E-03 | 1.0E-03 | 4.9E-03 | 2.51 | <0.001 | BD |
| OTU810  | Firmicutes     | Lachnospiraceae    | Lachnospira                 | 2.9E-03 | 8.5E-03 | 1.4E-03 | 5.6E-03 | 2.93 | <0.001 | HC |
| OTU835  | Bacteroidetes  | Prevotellaceae     | Prevotella_9                | 1.7E-02 | 5.4E-02 | 3.2E-03 | 1.6E-02 | 3.82 | <0.001 | HC |
| OTU921  | Firmicutes     | Lachnospiraceae    | Lachnospiraceae_NK4A136     | 1.4E-03 | 4.6E-03 | 6.1E-04 | 1.7E-03 | 2.59 | <0.001 | HC |
| OTU964  | Actinobacteria | Coriobacteriaceae  | Eggerthella                 | 4.6E-04 | 1.2E-03 | 1.4E-03 | 4.7E-03 | 2.67 | <0.001 | BD |

**Table S5. Discriminatory operational taxonomic units (OTUs) between MDD and BD groups.**

| OTU ID  | Taxonomic Assignment |                       |                           | Relative Abundance |         |          |         | LDA value | LDA p-value | Enrichment group |
|---------|----------------------|-----------------------|---------------------------|--------------------|---------|----------|---------|-----------|-------------|------------------|
|         | Phyla                | Family                | Genus                     | MDD(mean)          | MDD(SD) | BD(mean) | BD(SD)  |           |             |                  |
| OTU963  | Firmicutes           | Veillonellaceae       | Dialister                 | 1.1E-02            | 1.5E-02 | 2.3E-02  | 3.5E-02 | 3.8       | 0.001       | BD               |
| OTU255  | Firmicutes           | Streptococcaceae      | Streptococcus             | 6.0E-04            | 1.0E-03 | 1.7E-03  | 3.9E-03 | 2.78      | 0.001       | BD               |
| OTU2588 | Firmicutes           | Streptococcaceae      | Streptococcus             | 2.2E-03            | 3.6E-03 | 9.5E-04  | 2.8E-03 | 2.81      | <0.001      | MDD              |
| OTU1277 | Firmicutes           | Ruminococcaceae       | Faecalibacterium          | 3.6E-04            | 2.7E-03 | 2.7E-03  | 2.0E-02 | 3.01      | 0.047       | BD               |
| OTU2181 | Firmicutes           | Ruminococcaceae       | Faecalibacterium          | 1.4E-03            | 4.0E-03 | 6.9E-04  | 1.9E-03 | 2.56      | 0.022       | MDD              |
| OTU2319 | Firmicutes           | Ruminococcaceae       | Butyricoccus              | 3.9E-04            | 2.1E-03 | 1.1E-03  | 7.7E-03 | 2.71      | 0.011       | BD               |
| OTU249  | Proteobacteria       | Pseudomonadaceae      | Pseudomonas               | 2.6E-03            | 3.3E-03 | 5.4E-03  | 9.1E-03 | 3.12      | 0.001       | BD               |
| OTU245  | Bacteroidetes        | Prevotellaceae        | Prevotella_9              | 3.2E-04            | 1.4E-03 | 1.5E-03  | 6.0E-03 | 2.74      | <0.001      | BD               |
| OTU2984 | Bacteroidetes        | Prevotellaceae        | Prevotella_9              | 2.8E-03            | 5.2E-03 | 8.3E-04  | 2.7E-03 | 2.99      | <0.001      | MDD              |
| OTU1951 | Firmicutes           | Peptostreptococcaceae | unclassified              | 3.1E-03            | 1.1E-02 | 4.5E-04  | 1.5E-03 | 3.08      | <0.001      | MDD              |
| OTU385  | Firmicutes           | Peptostreptococcaceae | Romboutsia                | 3.1E-04            | 1.9E-03 | 4.1E-02  | 1.1E-01 | 4.28      | <0.001      | BD               |
| OTU1103 | Firmicutes           | Lachnospiraceae       | Blautia                   | 2.6E-02            | 6.9E-02 | 5.2E-02  | 1.0E-01 | 4.14      | 0.014       | BD               |
| OTU1166 | Firmicutes           | Lachnospiraceae       | Blautia                   | 3.8E-03            | 1.9E-02 | 4.9E-04  | 1.7E-03 | 3.15      | <0.001      | MDD              |
| OTU1823 | Firmicutes           | Lachnospiraceae       | Eubacterium_rectale_group | 4.4E-02            | 1.1E-01 | 9.3E-03  | 4.9E-02 | 4.22      | <0.001      | MDD              |
| OTU2415 | Firmicutes           | Lachnospiraceae       | Coprococcus_2             | 1.4E-03            | 3.6E-03 | 5.4E-04  | 3.4E-03 | 2.64      | <0.001      | MDD              |
| OTU36   | Firmicutes           | Lachnospiraceae       | Lachnoclostridium         | 9.0E-03            | 1.1E-02 | 2.3E-02  | 3.3E-02 | 3.84      | <0.001      | BD               |
| OTU418  | Firmicutes           | Lachnospiraceae       | Anaerostipes              | 2.3E-03            | 5.9E-03 | 5.4E-03  | 1.4E-02 | 3.18      | 0.002       | BD               |
| OTU740  | Firmicutes           | Lachnospiraceae       | Blautia                   | 8.4E-03            | 2.6E-02 | 8.7E-04  | 5.9E-03 | 3.58      | 0.001       | MDD              |
| OTU835  | Firmicutes           | Lachnospiraceae       | Eubacterium_hallii_group  | 2.5E-02            | 6.3E-02 | 3.2E-03  | 1.6E-02 | 4.04      | <0.001      | MDD              |



|         |                |                     |                        |         |         |         |         |      |        |     |
|---------|----------------|---------------------|------------------------|---------|---------|---------|---------|------|--------|-----|
| OTU1956 | Firmicutes     | Erysipelotrichaceae | Erysipelatoclostridium | 5.1E-03 | 1.0E-02 | 1.8E-03 | 4.9E-03 | 3.19 | <0.001 | MDD |
| OTU2151 | Firmicutes     | Enterococcaceae     | Enterococcus           | 7.7E-04 | 1.3E-03 | 3.2E-03 | 1.3E-02 | 3.09 | 0.031  | BD  |
| OTU2721 | Proteobacteria | Enterobacteriaceae  | Escherichia-Shigella   | 2.6E-03 | 1.6E-02 | 8.3E-04 | 5.0E-03 | 2.93 | 0.025  | MDD |
| OTU43   | Actinobacteria | Coriobacteriaceae   | Eggerthella            | 1.0E-02 | 2.8E-02 | 1.6E-03 | 9.6E-03 | 3.61 | 0.003  | MDD |
| OTU1957 | Actinobacteria | Bifidobacteriaceae  | Bifidobacterium        | 2.6E-03 | 5.4E-03 | 7.4E-04 | 2.3E-03 | 2.93 | <0.001 | MDD |
| OTU1950 | Bacteroidetes  | Bacteroidaceae      | Bacteroides            | 8.5E-03 | 1.8E-02 | 2.8E-03 | 7.0E-03 | 3.51 | <0.001 | MDD |
| OTU1963 | Bacteroidetes  | Bacteroidaceae      | Bacteroides            | 5.3E-03 | 7.3E-03 | 1.8E-03 | 4.0E-03 | 3.23 | <0.001 | MDD |
| OTU2011 | Bacteroidetes  | Bacteroidaceae      | Bacteroides            | 1.1E-03 | 6.6E-03 | 4.1E-04 | 1.7E-03 | 2.62 | 0.001  | MDD |
| OTU2957 | Bacteroidetes  | Bacteroidaceae      | Bacteroides            | 1.4E-03 | 9.8E-03 | 3.0E-04 | 2.9E-03 | 2.82 | 0.001  | MDD |
| OTU79   | Bacteroidetes  | Bacteroidaceae      | Bacteroides            | 3.5E-04 | 2.4E-03 | 2.9E-02 | 6.8E-02 | 4.14 | <0.001 | BD  |
| OTU810  | Bacteroidetes  | Bacteroidaceae      | Bacteroides            | 3.9E-03 | 8.9E-03 | 1.4E-03 | 5.6E-03 | 3.15 | 0.001  | MDD |
| OTU876  | Bacteroidetes  | Bacteroidaceae      | Bacteroides            | 5.7E-04 | 2.3E-03 | 1.3E-03 | 3.1E-03 | 2.56 | 0.044  | BD  |
| OTU910  | Bacteroidetes  | Bacteroidaceae      | Bacteroides            | 1.5E-03 | 3.4E-03 | 5.9E-04 | 1.5E-03 | 2.73 | <0.001 | MDD |
| OTU2735 | Firmicutes     | Acidaminococcaceae  | Phascolarctobacterium  | 1.5E-03 | 3.6E-03 | 4.1E-03 | 1.5E-02 | 3.08 | 0.006  | BD  |
| OTU964  | Firmicutes     | Acidaminococcaceae  | Phascolarctobacterium  | 5.1E-04 | 1.5E-03 | 1.4E-03 | 4.7E-03 | 2.65 | <0.001 | BD  |

**Table S6. Discriminatory operational taxonomic units (OTUs) among HC, MDD and BD groups.**

| OTU ID  | Taxonomic Assignment |                     |                             | Relative Abundance |         |           |         |          |         | LDA value | LDA p-value | Enrichment |
|---------|----------------------|---------------------|-----------------------------|--------------------|---------|-----------|---------|----------|---------|-----------|-------------|------------|
|         | Phyla                | Family              | Genus                       | HC(mean)           | HC(SD)  | MDD(mean) | MDD(SD) | BD(mean) | BD(SD)  |           |             |            |
| OTU1712 | Proteobacteria       | Pseudomonadaceae    | Pseudomonas                 | 1.4E-02            | 2.5E-02 | 9.0E-03   | 1.1E-02 | 2.3E-02  | 3.3E-02 | 2.75      | 0.001       | BD         |
| OTU1831 | Firmicutes           | Lachnospiraceae     | Ruminococcus_gnavus         | 1.4E-03            | 5.0E-03 | 3.0E-03   | 8.5E-03 | 5.3E-03  | 1.3E-02 | 3.13      | 0.001       | BD         |
| OTU1950 | Bacteroidetes        | Bacteroidaceae      | Bacteroides                 | 1.7E-03            | 3.2E-03 | 1.1E-03   | 2.2E-03 | 9.5E-04  | 2.2E-03 | 3.48      | <0.001      | MDD        |
| OTU1956 | Bacteroidetes        | Bacteroidaceae      | Bacteroides                 | 4.5E-03            | 5.7E-03 | 3.2E-03   | 3.1E-03 | 2.7E-03  | 4.2E-03 | 3.25      | <0.001      | MDD        |
| OTU1957 | Bacteroidetes        | Bacteroidaceae      | Bacteroides                 | 1.0E-03            | 3.0E-03 | 2.6E-03   | 5.4E-03 | 7.4E-04  | 2.3E-03 | 2.98      | <0.001      | MDD        |
| OTU1963 | Bacteroidetes        | Bacteroidaceae      | Bacteroides                 | 7.9E-04            | 3.8E-03 | 1.1E-04   | 4.5E-04 | 1.0E-04  | 6.2E-04 | 3.27      | <0.001      | MDD        |
| OTU1964 | Firmicutes           | Ruminococcaceae     | Faecalibacterium            | 1.3E-03            | 3.3E-03 | 7.7E-04   | 1.3E-03 | 3.2E-03  | 1.3E-02 | 2.95      | <0.001      | HC         |
| OTU2005 | Firmicutes           | Ruminococcaceae     | Ruminiclostridium_6         | 8.2E-03            | 4.6E-02 | 9.9E-04   | 4.0E-03 | 1.1E-03  | 5.2E-03 | 2.6       | <0.001      | HC         |
| OTU2016 | Firmicutes           | Lachnospiraceae     | Ruminococcus_gaureauii      | 1.5E-03            | 4.1E-03 | 1.2E-03   | 5.7E-03 | 6.3E-04  | 2.6E-03 | 2.58      | <0.001      | HC         |
| OTU2131 | Firmicutes           | Erysipelotrichaceae | Erysipelotrichaceae_UCG-003 | 3.9E-03            | 1.1E-02 | 8.5E-03   | 1.8E-02 | 2.8E-03  | 7.0E-03 | 2.86      | 0.001       | MDD        |
| OTU2151 | Firmicutes           | Ruminococcaceae     | Subdoligranulum             | 2.8E-06            | 8.3E-06 | 4.5E-06   | 4.1E-05 | 5.3E-04  | 1.5E-03 | 3.1       | <0.001      | BD         |
| OTU2572 | Firmicutes           | Lachnospiraceae     | Roseburia                   | 1.8E-03            | 6.4E-03 | 7.0E-04   | 1.4E-03 | 4.6E-04  | 1.1E-03 | 2.79      | <0.001      | HC         |
| OTU2588 | Bacteroidetes        | Bacteroidaceae      | Bacteroides                 | 1.7E-03            | 5.4E-03 | 3.1E-03   | 7.8E-03 | 4.3E-03  | 1.1E-02 | 2.84      | <0.001      | MDD        |
| OTU2663 | Proteobacteria       | Enterobacteriaceae  | Citrobacter                 | 5.4E-06            | 1.6E-05 | 9.8E-06   | 2.4E-05 | 2.4E-06  | 9.4E-06 | 3.53      | <0.001      | HC         |

|         |                |                       |                     |         |         |         |         |         |         |      |        |     |
|---------|----------------|-----------------------|---------------------|---------|---------|---------|---------|---------|---------|------|--------|-----|
| OTU2781 | Firmicutes     | Lachnospiraceae       | Coprococcus_2       | 1.7E-03 | 3.6E-03 | 2.2E-03 | 3.6E-03 | 9.5E-04 | 2.8E-03 | 2.66 | <0.001 | HC  |
| OTU2918 | Bacteroidetes  | Bacteroidaceae        | Bacteroides         | 4.3E-06 | 1.3E-05 | 2.8E-06 | 1.2E-05 | 8.1E-06 | 2.1E-05 | 2.52 | <0.001 | MDD |
| OTU2984 | Bacteroidetes  | Bacteroidaceae        | Bacteroides         | 3.4E-03 | 6.2E-03 | 5.3E-03 | 7.3E-03 | 1.8E-03 | 4.0E-03 | 3.01 | <0.001 | MDD |
| OTU36   | Firmicutes     | Lachnospiraceae       | Blautia             | 2.1E-04 | 4.0E-04 | 3.5E-04 | 2.4E-03 | 2.9E-02 | 6.8E-02 | 3.85 | <0.001 | BD  |
| OTU385  | Proteobacteria | Pseudomonadaceae      | Pseudomonas         | 8.9E-03 | 2.0E-02 | 7.2E-03 | 2.0E-02 | 1.1E-02 | 1.7E-02 | 4.27 | <0.001 | BD  |
| OTU386  | Proteobacteria | Oxalobacteraceae      | Herminiimonas       | 1.2E-03 | 3.1E-03 | 1.4E-03 | 2.8E-03 | 8.1E-04 | 2.6E-03 | 2.53 | <0.001 | BD  |
| OTU478  | Firmicutes     | Lachnospiraceae       | Ruminococcus_gnavus | 4.4E-04 | 1.4E-03 | 1.2E-03 | 4.2E-03 | 2.2E-03 | 6.2E-03 | 3.29 | <0.001 | BD  |
| OTU485  | Firmicutes     | Lachnospiraceae       | Lachnoclostridium   | 2.2E-04 | 4.3E-04 | 3.1E-04 | 1.9E-03 | 4.1E-02 | 1.1E-01 | 2.94 | <0.001 | BD  |
| OTU761  | Firmicutes     | Lachnospiraceae       | Tyzzereella_4       | 1.1E-03 | 2.6E-03 | 2.8E-03 | 5.2E-03 | 8.3E-04 | 2.7E-03 | 2.74 | <0.001 | BD  |
| OTU79   | Proteobacteria | Pseudomonadaceae      | Pseudomonas         | 2.3E-04 | 1.3E-03 | 1.9E-03 | 1.0E-02 | 1.0E-03 | 4.9E-03 | 4.13 | <0.001 | BD  |
| OTU8    | Fusobacteria   | Fusobacteriaceae      | Fusobacterium       | 2.4E-03 | 7.1E-03 | 5.1E-03 | 1.0E-02 | 1.8E-03 | 4.9E-03 | 2.88 | <0.001 | MDD |
| OTU901  | Firmicutes     | Peptostreptococcaceae | Romboutsia          | 6.4E-04 | 2.3E-03 | 1.1E-03 | 4.1E-03 | 1.6E-03 | 4.5E-03 | 3.37 | <0.001 | BD  |
